# Supplementary material for: Revisiting Brucellosis in Small Ruminants of Western Border Areas in Pakistan
Source: PubMed Central journal article supplement (PMC7697571; doi:10.3390/pathogens9110929), 2020-11-10
Supplement: pathogens-09-00929-s001.pdf [file pathogens-09-00929-s001.pdf]

**Table S1:** Primer and probes sequence for real-time PCR

| Genes detected                                  | Primers/Probes | Sequence (5'-3')                      | Reference |
|-------------------------------------------------|----------------|---------------------------------------|-----------|
| <i>Brucella (bcsp31)</i>                        | Forward Primer | GCTCGGTTGCCAATATCAATGC                |           |
|                                                 | Reverse Primer | GGGTAAAGCGTCGCCAGAAG                  |           |
|                                                 | Probe          | FAM-AAATCTTCCACCTTGCCCTTGCCATCA-BHQ   |           |
| <i>Brucella abortus (IS711)</i> <sup>1</sup>    | Forward Primer | GCGGCTTTTCTATCACGGTATTC               |           |
|                                                 | Reverse Primer | CATGCGCTATGATCTGGTTACG                | [17]      |
|                                                 | Probe          | HEX-CGCTCATGCTCGCCAGACTTCAATG-BHQ     |           |
| <i>Brucella melitensis (IS711)</i> <sup>2</sup> | Forward Primer | AACAAGCGGCACCCCTAAAA                  |           |
|                                                 | Reverse Primer | CATGCGCTATGATCTGGTTACG                |           |
|                                                 | Probe          | Cy5-CAGGAGTGTTCGGCTCAGAATAATCCACA-BHQ |           |

<sup>1</sup>alkB *Brucella abortus* biotype 1 (strain 544/\*ATCC 23448), <sup>2</sup>BMEI1162 *Brucella melitensis* biotype 1 (strain 16M/\*ATCC 23456), \*American Type Culture Collection
